# Supplementary material for: Design and MinION testing of a nanopore targeted gene sequencing panel for chronic lymphocytic leukemia
Source: PubMed Central journal article supplement (PMC6081477; doi:10.1038/s41598-018-30330-y), 2018-08-07
Supplement: 41598_2018_30330_MOESM1_ESM.pdf [file 41598_2018_30330_MOESM1_ESM.pdf]

**Design and MinION testing of a nanopore targeted gene sequencing panel for chronic lymphocytic leukemia**

Paola Orsini<sup>1</sup>, Crescenzo F. Minervini<sup>1</sup>, Cosimo Cumbo<sup>1</sup>, Luisa Anelli<sup>1</sup>, Antonella Zagaria<sup>1</sup>, Angela Minervini<sup>1</sup>, Nicoletta Coccaro<sup>1</sup>, Giuseppina Tota<sup>1</sup>, Paola Casieri<sup>1</sup>, Luciana Impera<sup>1</sup>, Elisa Parciante<sup>1</sup>, Claudia Brunetti<sup>1</sup>, Annamaria Giordano<sup>1</sup>, Giorgina Specchia<sup>1</sup>, Francesco Albano<sup>1\*</sup>

### Supplementary Table S1.

Number of 2D passed reads for each CLL sample, demultiplexed by Metrichor software.

| <b>CLL sample</b>   | <b>Read Count</b> |
|---------------------|-------------------|
| <b>case#1</b>       | 3262              |
| <b>case#2</b>       | 5220              |
| <b>case#3</b>       | 2435              |
| <b>case#4</b>       | 3429              |
| <b>case#5</b>       | 4187              |
| <b>case#6</b>       | 4896              |
| <b>case#7</b>       | 1553              |
| <b>case#8</b>       | 5847              |
| <b>case#9</b>       | 5437              |
| <b>case#10</b>      | 3892              |
| <b>case#11</b>      | 3577              |
| <b>case#12</b>      | 2716              |
| <b>unclassified</b> | 2148              |

**Supplementary Table S2**

Error rate analysis of MinION sequencing data for known CLL hotspot mutations.

**Supplementary Table S3.**

List and annotation of the 256 genomic recurrently mutated positions determined in the CLL patients analyzed; as observed, most of them (91%) were sites of indels, in agreement with the results of error rate analysis. The flanking sequences of these critical genomic positions are reported.

**Supplementary Table S4**

List and annotation of the 18 non-recurrent variants and known hotposts identified in the CLL patients analyzed.

### Supplementary Table S5.

Primers sequences of CLL panel.

| <b>Gene target</b>   | <b>Forward primer</b>          | <b>Reverse primer</b>          |
|----------------------|--------------------------------|--------------------------------|
| <b>SF3B1 ex14-16</b> | TCTGTTTTAATGTAGTTTGCTTCTACACCA | CTCATGACTGTCCTTTCTTTGTTTACATTT |
| <b>TP53 ex10-11</b>  | ACACCTATTGCAAGCAAGGGTT         | AAAAGTCAGCTGTATAGGTA CTTGAAGTG |
| <b>NOTCH1 ex34</b>   | CTGTGTGTCCATCTCCCTACAA         | GTTTCAGAAGATGTATCAAAGCCTTAACAT |
| <b>TP53 ex2-9</b>    | TTTTGAAAGCTGGTCTGGTCCTT        | TTCATGCTGGATCCCCACT            |
| <b>BIRC3 ex6</b>     | CCTGCCATTCTGTTTCCTTC           | TGAGCAACTAGCCTGGGATT           |
| <b>BIRC3 ex7-9</b>   | TGGAAGGAAGTTTGTGAGCA           | AGTGCTACCTCTTTTTCGTTCA         |
| <b>MYD88 ex3-5</b>   | GAGATAATAGTCCTACCTCTGGATTGCT   | GCAAATATCGGCTTTTCTCAGATATCTTTG |

### Supplementary Fig. S1

Visualization of pool 1 (a) and pool 2 (b) purified amplicons by SYBR Safe on agarose gel 1.0%. As shown, digestion with BglII restriction enzyme allowed to verify the successful amplification of all the targets of pool 1 (a), whereas the pool 2 purified amplicons were directly visualized (b). The original images of the two gels are provided as Supplementary Figures S5-S6.

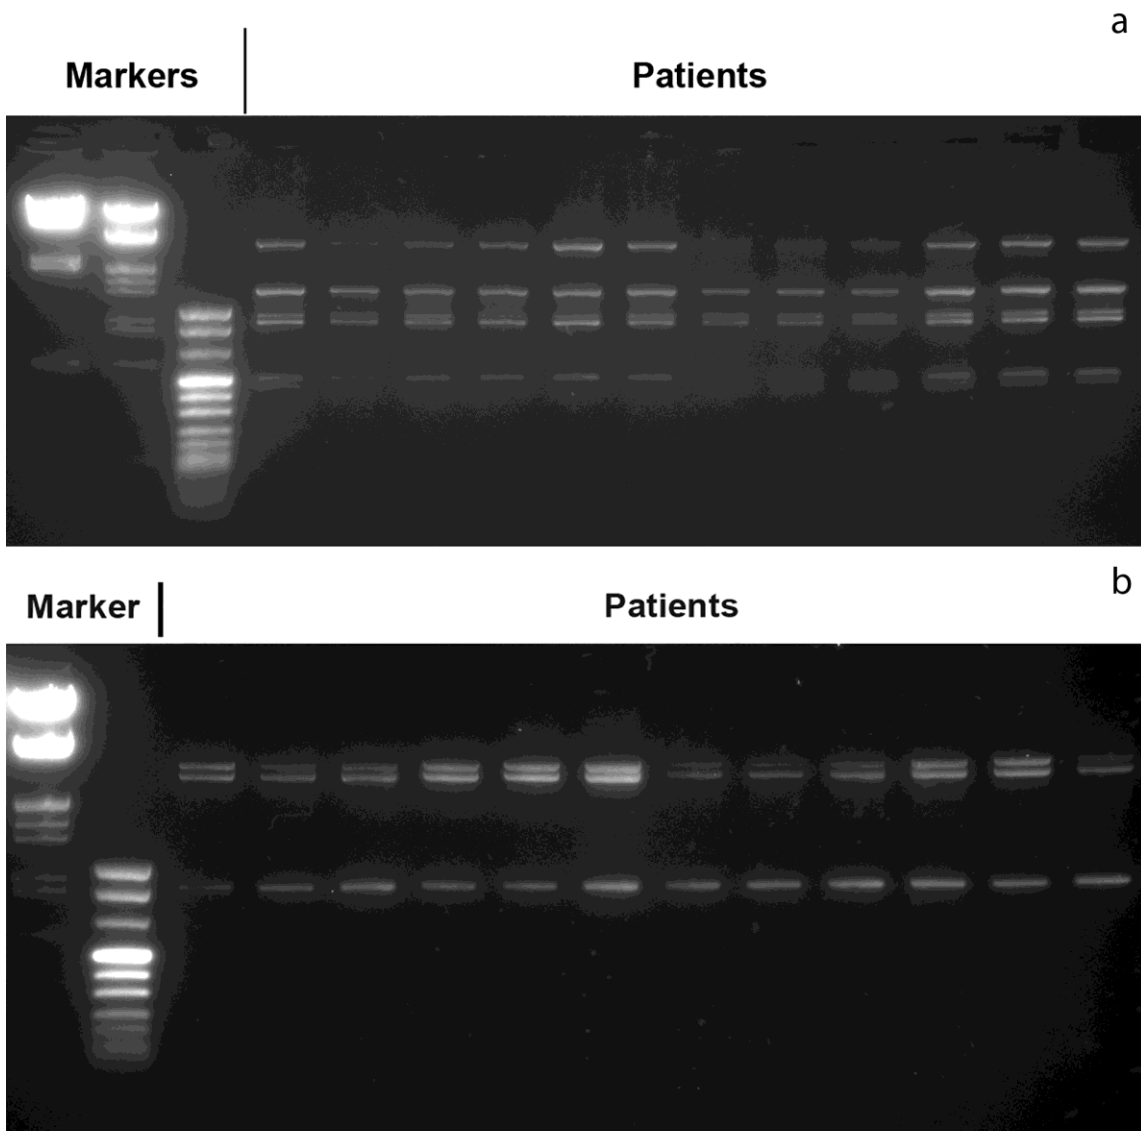

### Supplementary Fig. S2

2D Sequence Length vs Quality Score. Data from Sequence Length distribution (y-axis) and Mean Quality Score distribution (x-axis) are plotted. 2D reads with the higher quality score are distributed around the mean amplicons size, as expected.

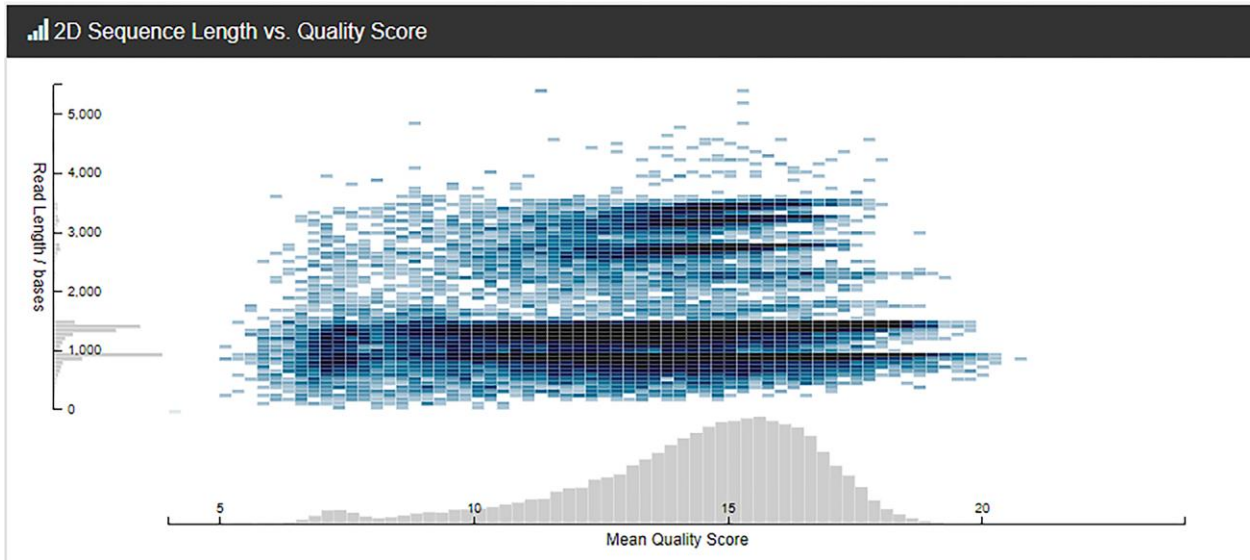

### Supplementary Fig. S3

Two mutated cases that were well visible in MinION and were simultaneously confirmed by Sanger Sequencing (SS) (a) or molecular assay (b), in case#9 and case#12, respectively (M: Molecular marker; NC: Negative Control; PC: Positive Control). The original scan of the gel image is provided as Supplementary Figure S7.

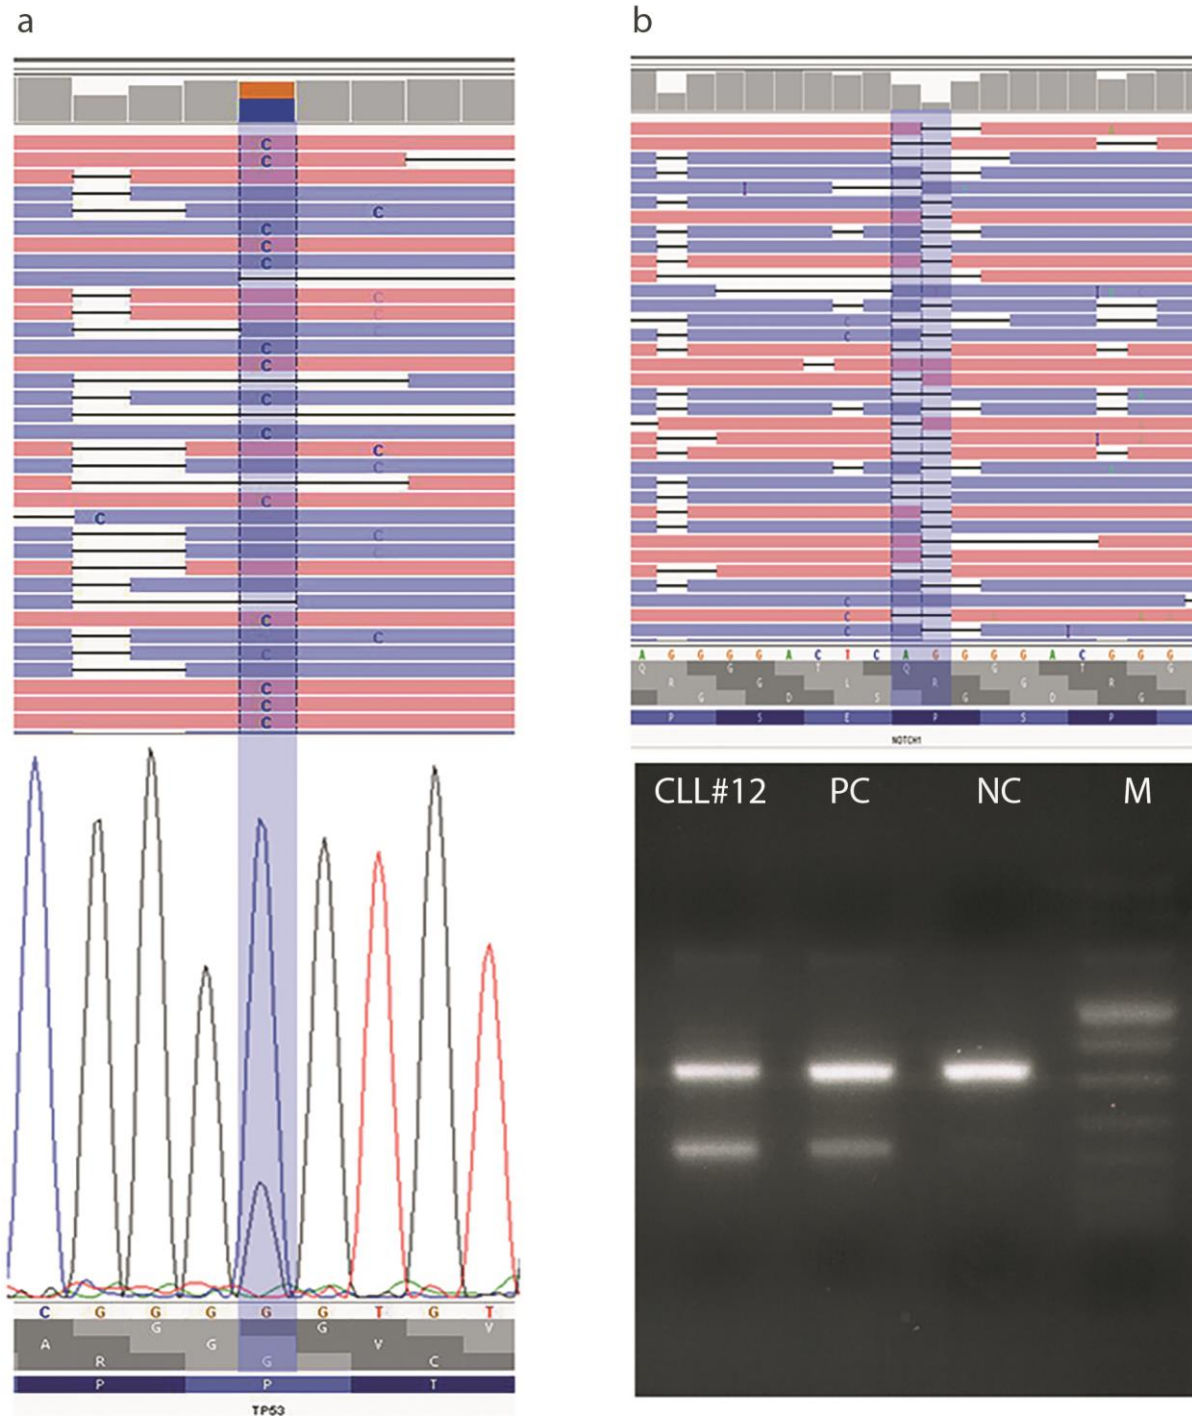

## Supplementary File S1

Description of the pipeline implemented in Galaxy.

### Pipeline GALAXY

Step 1: Map with BWA-MEM

```
Use a built-in genome          index
Using reference genome:       hg19
Single or Paired-end reads:   Single
Set read groups information?  Do not set
Select analysis mode          3.Nanopore 2D-reads mode (-x
ont2d)
Job Resource Parameters      Use default job resource parameters
```

Step 2: BamLeftAlign

```
Using reference genome        hg19
Maximum number of iterations  5
```

Step 3: Generate pileup

```
Using reference genome        hg19
Where to cap mapping quality  500
Call consensus according to MAQ model? No
```

Step 4: Varscan

```
Pileup dataset
Analysis type                  single nucleotide variation
Minimum read depth            20
Minimum supporting reads      5
Minimum base quality at a position to count a read  8
Minimum variant allele frequency threshold  0.05
Minimum frequency to call homozygote  0.75
p-value threshold for calling variants  0.99
Ignore variants with >90% support on one strand  yes
```

Step 5: Varscan

```
Pileup dataset
Analysis type  insertions and deletions
Minimum read depth  20
Minimum supporting reads 5
Minimum base quality at a position to count a read  8
Minimum variant allele frequency threshold  0.05
Minimum frequency to call homozygote  0.75
p-value threshold for calling variants  0.99
Ignore variants with >90% support on one strand  yes
sample_names  Empty.
```

Step 7: ANNOVAR Annotate VCF

```
Variants
Output dataset 'output' from step 4
Gene Annotations  refGene
Annotation Regions  genomicSuperDups phastConsElements46way
```



Annotation Databases 1000g avsift dbsnp\_NonFlagged  
esp6500si\_all dbsnp cosmic  
Output data type Tabular

Step 8: ANNOVAR Annotate VCF

Variants

Output dataset 'output' from step 5

Gene Annotations refGene

Annotation Regions genomicSuperDups phastConsElements46way

Annotation Databases 1000g avsift dbsnp\_NonFlagged

esp6500si\_all dbsnp cosmic

Output data type Tabular
